# Supplementary material for: Magnetic Switching in Vapochromic Oxalato-Bridged 2D Copper(II)-Pyrazole Compounds for Biogenic Amine Sensing
Source: MDPI journal article supplement (doi:10.3390/magnetochemistry7050065), 2021-05-12

# checkCIF/PLATON report

You have not supplied any structure factors. As a result the full set of tests cannot be run.

THIS REPORT IS FOR GUIDANCE ONLY. IF USED AS PART OF A REVIEW PROCEDURE FOR PUBLICATION, IT SHOULD NOT REPLACE THE EXPERTISE OF AN EXPERIENCED CRYSTALLOGRAPHIC REFEREE.

No syntax errors found.      CIF dictionary      Interpreting this report

## Datablock: isa341\_newref

---

|                 |                          |                                |
|-----------------|--------------------------|--------------------------------|
| Bond precision: | C-C = 0.0069 A           | Wavelength=1.54178             |
| Cell:           | a=9.9554(5)              | b=9.3037(4)      c=25.2695(12) |
|                 | alpha=90                 | beta=94.670(3)      gamma=90   |
| Temperature:    | 98 K                     |                                |
|                 | Calculated               | Reported                       |
| Volume          | 2332.74(19)              | 2332.74(19)                    |
| Space group     | P 21/c                   | P 21/c                         |
| Hall group      | -P 2ybc                  | -P 2ybc                        |
| Moiety formula  | C18 H18 Cu3 N6 O12, H2 O | C6 H6 Cu N2 O4, 1/3(H2 O)      |
| Sum formula     | C18 H20 Cu3 N6 O13       | C6 H6.67 Cu N2 O4.33           |
| Mr              | 719.05                   | 239.67                         |
| Dx,g cm-3       | 2.047                    | 2.047                          |
| Z               | 4                        | 12                             |
| Mu (mm-1)       | 3.949                    | 3.949                          |
| F000            | 1444.0                   | 1444.0                         |
| F000'           | 1424.68                  |                                |
| h,k,lmax        | 11,10,29                 | 11,10,29                       |
| Nref            | 3960                     | 3947                           |
| Tmin,Tmax       | 0.789,0.980              | 0.648,0.753                    |
| Tmin'           | 0.648                    |                                |

Correction method= # Reported T Limits: Tmin=0.648 Tmax=0.753  
AbsCorr = MULTI-SCAN

Data completeness= 0.997      Theta(max)= 65.054

R(reflections)= 0.0497( 2956)      wR2(reflections)= 0.1422( 3947)

S = 1.079      Npar= 370

---

The following ALERTS were generated. Each ALERT has the format

**test-name\_ALERT\_alert-type\_alert-level.**

Click on the hyperlinks for more details of the test.

---

### ● Alert level C

THETM01\_ALERT\_3\_C The value of  $\sin(\theta_{\max})/\lambda$  is less than 0.590  
Calculated  $\sin(\theta_{\max})/\lambda = 0.5881$   
PLAT094\_ALERT\_2\_C Ratio of Maximum / Minimum Residual Density .... 2.25 Report  
PLAT213\_ALERT\_2\_C Atom C13 has ADP max/min Ratio ..... 4.0 prolat  
PLAT341\_ALERT\_3\_C Low Bond Precision on C-C Bonds ..... 0.00692 Ang.  
PLAT480\_ALERT\_4\_C Long H...A H-Bond Reported H6 ..04 . 2.65 Ang.

---

### ● Alert level G

CELLZ01\_ALERT\_1\_G Difference between formula and atom\_site contents detected.  
CELLZ01\_ALERT\_1\_G ALERT: check formula stoichiometry or atom site occupancies.  
From the CIF: \_cell\_formula\_units\_Z 12  
From the CIF: \_chemical\_formula\_sum C6 H6.67 Cu N2 O4.33  
TEST: Compare cell contents of formula and atom\_site data

| atom | Z*formula | cif sites | diff  |
|------|-----------|-----------|-------|
| C    | 72.00     | 72.00     | 0.00  |
| H    | 80.04     | 80.00     | 0.04  |
| Cu   | 12.00     | 12.00     | 0.00  |
| N    | 24.00     | 24.00     | 0.00  |
| O    | 51.96     | 52.00     | -0.04 |

PLAT002\_ALERT\_2\_G Number of Distance or Angle Restraints on AtSite 3 Note  
PLAT004\_ALERT\_5\_G Polymeric Structure Found with Maximum Dimension 2 Info  
PLAT007\_ALERT\_5\_G Number of Unrefined Donor-H Atoms ..... 3 Report  
PLAT042\_ALERT\_1\_G Calc. and Reported Moiety Formula Strings Differ Please Check  
PLAT045\_ALERT\_1\_G Calculated and Reported Z Differ by a Factor ... 0.33 Check  
PLAT083\_ALERT\_2\_G SHELXL Second Parameter in WGHT Unusually Large 7.89 Why ?  
PLAT172\_ALERT\_4\_G The CIF-Embedded .res File Contains DFIX Records 2 Report  
PLAT432\_ALERT\_2\_G Short Inter X...Y Contact O1W ..C1 3.00 Ang.  
x,y,z = 1\_555 Check  
PLAT720\_ALERT\_4\_G Number of Unusual/Non-Standard Labels ..... 2 Note  
PLAT774\_ALERT\_1\_G Check X-Y Bond in CIF: Cu1 --Cu2 .. 4.11 Ang.  
PLAT774\_ALERT\_1\_G Check X-Y Bond in CIF: Cu1 --Cu1 .. 5.22 Ang.  
PLAT774\_ALERT\_1\_G Check X-Y Bond in CIF: Cu1 --Cu3 .. 5.52 Ang.  
PLAT774\_ALERT\_1\_G Check X-Y Bond in CIF: Cu1 --Cu1 .. 5.69 Ang.  
PLAT774\_ALERT\_1\_G Check X-Y Bond in CIF: Cu2 --Cu3 .. 5.18 Ang.  
PLAT774\_ALERT\_1\_G Check X-Y Bond in CIF: Cu2 --Cu3 .. 5.52 Ang.  
PLAT794\_ALERT\_5\_G Tentative Bond Valency for Cu1 (II) . 2.11 Info  
PLAT794\_ALERT\_5\_G Tentative Bond Valency for Cu2 (II) . 2.14 Info  
PLAT794\_ALERT\_5\_G Tentative Bond Valency for Cu3 (II) . 2.14 Info  
PLAT860\_ALERT\_3\_G Number of Least-Squares Restraints ..... 3 Note

---

0 **ALERT level A** = Most likely a serious problem - resolve or explain  
0 **ALERT level B** = A potentially serious problem, consider carefully  
5 **ALERT level C** = Check. Ensure it is not caused by an omission or oversight  
21 **ALERT level G** = General information/check it is not something unexpected

10 ALERT type 1 CIF construction/syntax error, inconsistent or missing data  
5 ALERT type 2 Indicator that the structure model may be wrong or deficient  
3 ALERT type 3 Indicator that the structure quality may be low  
3 ALERT type 4 Improvement, methodology, query or suggestion  
5 ALERT type 5 Informative message, check

---

---

It is advisable to attempt to resolve as many as possible of the alerts in all categories. Often the minor alerts point to easily fixed oversights, errors and omissions in your CIF or refinement strategy, so attention to these fine details can be worthwhile. In order to resolve some of the more serious problems it may be necessary to carry out additional measurements or structure refinements. However, the purpose of your study may justify the reported deviations and the more serious of these should normally be commented upon in the discussion or experimental section of a paper or in the "special\_details" fields of the CIF. checkCIF was carefully designed to identify outliers and unusual parameters, but every test has its limitations and alerts that are not important in a particular case may appear. Conversely, the absence of alerts does not guarantee there are no aspects of the results needing attention. It is up to the individual to critically assess their own results and, if necessary, seek expert advice.

### **Publication of your CIF in IUCr journals**

A basic structural check has been run on your CIF. These basic checks will be run on all CIFs submitted for publication in IUCr journals (*Acta Crystallographica*, *Journal of Applied Crystallography*, *Journal of Synchrotron Radiation*); however, if you intend to submit to *Acta Crystallographica Section C* or *E* or *IUCrData*, you should make sure that full publication checks are run on the final version of your CIF prior to submission.

### **Publication of your CIF in other journals**

Please refer to the *Notes for Authors* of the relevant journal for any special instructions relating to CIF submission.

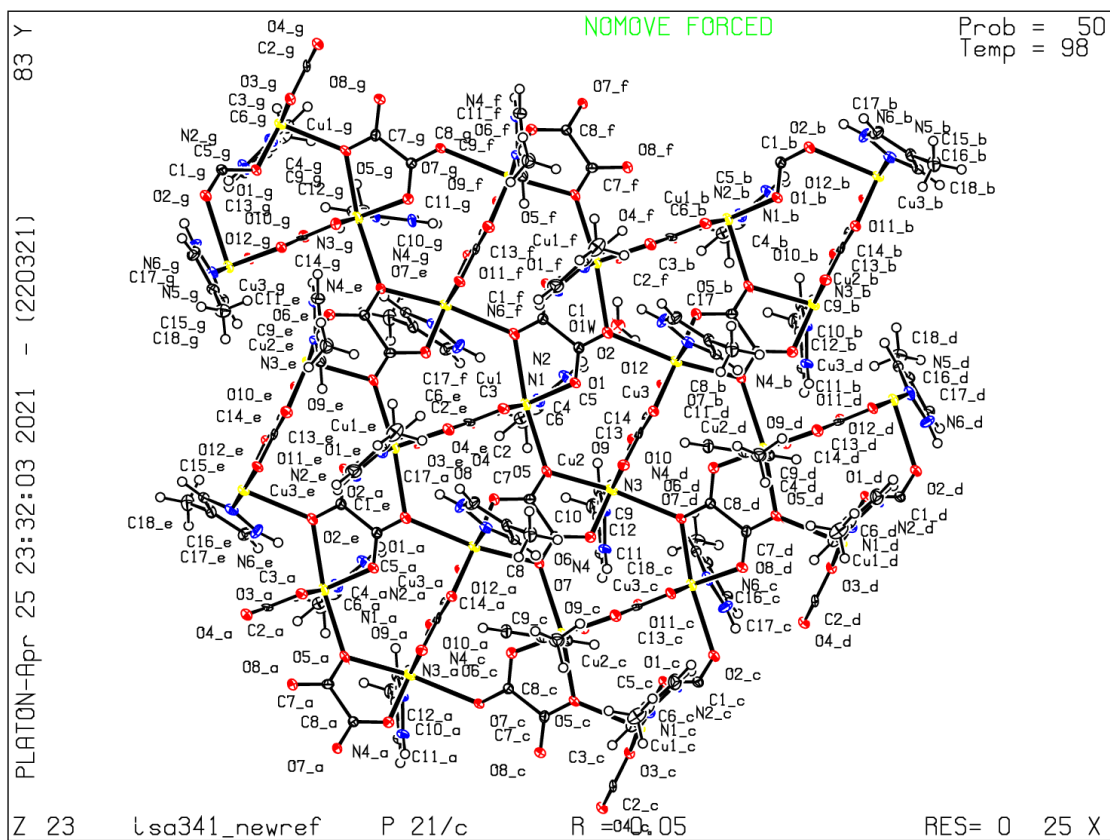

Supplement: s1 [file s1]
