# Supplementary figures and images for: Magnetic Switching in Vapochromic Oxalato-Bridged 2D Copper(II)-Pyrazole Compounds for Biogenic Amine Sensing
Source: MDPI journal article supplement (doi:10.3390/magnetochemistry7050065), 2021-05-12

# PXRD

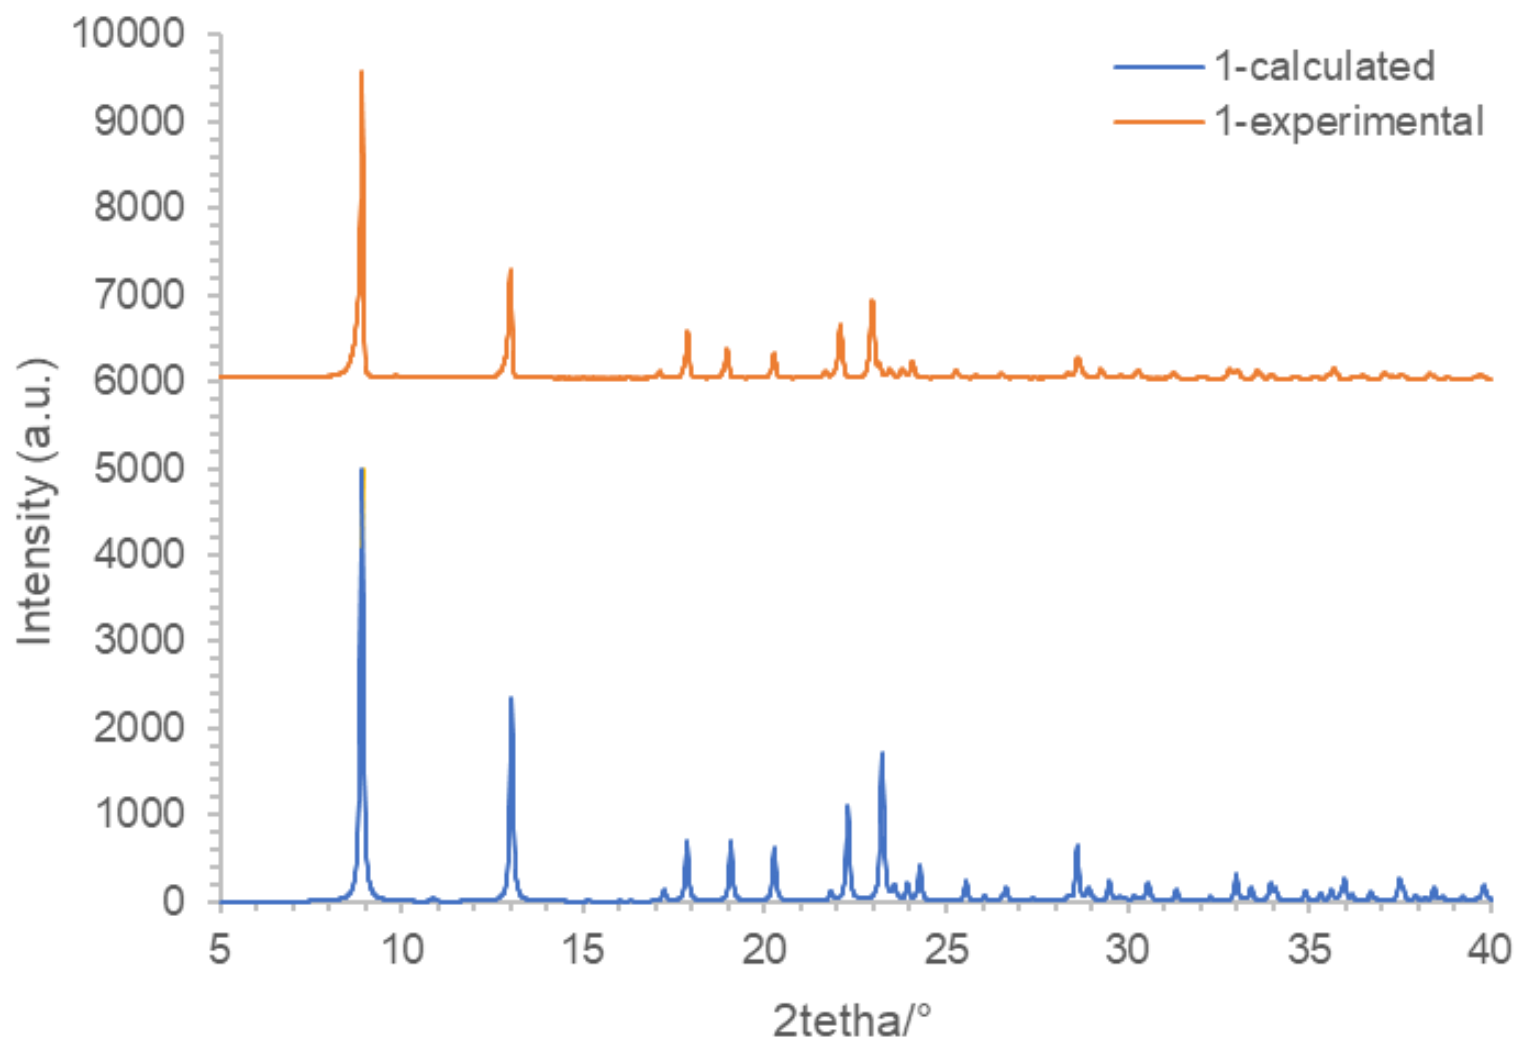

Supplement: s1 [file s1]

(a)

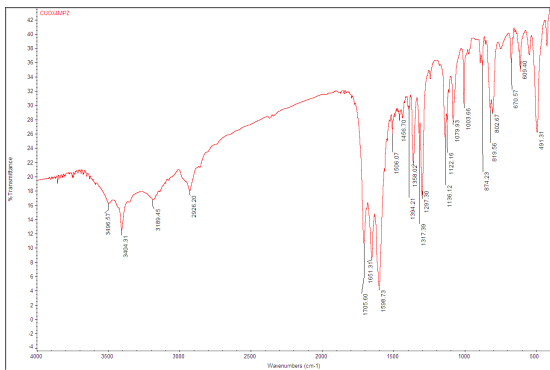

(b)

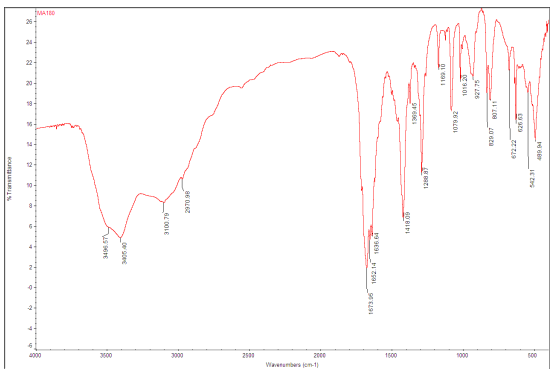

(c)

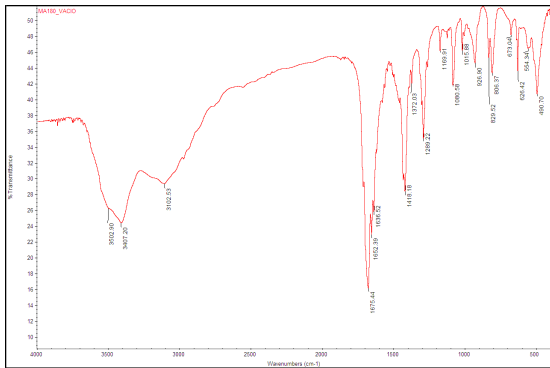

Supplement: s1 [file s1]
